# Supplementary material
Source: publisher figshare collection journal article supplement (https://acs.figshare.com/ndownloader/files/24205112)
Supplement: Supplementary file 1 [file 24205112]

## SUPPLEMENTAL INFORMATION

### Direct Automated MALDI Mass Spectrometry Analysis of Cellular Transporter Function: Inhibition of OATP2B1 Uptake by 294 Drugs

Melissa S. Unger<sup>1,2,3</sup>, Lena Schumacher<sup>1</sup>, Thomas Enzlein<sup>1</sup>, David Weigt<sup>1</sup>, Maciej J. Zamek-Gliszczynski<sup>4</sup>, Matthias Schwab<sup>5,6,7</sup>, Anne T. Nies<sup>5,6</sup>, Gerard Drewes<sup>3</sup>, Sandra Schulz<sup>1</sup>, Friedrich B.M. Reinhard<sup>3</sup>, Carsten Hopf<sup>1,2,\*</sup>

1. Center for Mass Spectrometry and Optical Spectroscopy (CeMOS), Mannheim University of Applied Sciences, Paul-Wittsack Str. 10, 68163 Mannheim, Germany
2. Institute of Medical Technology, Heidelberg University and Mannheim University of Applied Sciences, Theodor-Kutzer-Ufer 1-3, 68167 Mannheim, Germany
3. Cellzome – a GlaxoSmithKline company, Meyerhofstr. 1, 69177 Heidelberg, Germany
4. Drug Metabolism and Pharmacokinetics, GlaxoSmithKline, 1250 S Collegeville Rd, Collegeville, Pennsylvania 19426, United States
5. Dr. Margarete Fischer-Bosch Institute for Clinical Pharmacology, Auerbachstr. 112, 70376 Stuttgart, Germany
6. iFit Cluster of Excellence (EXC2180) “Image Guided and Functionally Instructed Tumor Therapies”, University of Tübingen, Tübingen, Germany
7. Departments of Clinical Pharmacology, Pharmacy and Biochemistry, University of Tübingen, Geschwister Scholl Platz, 72074 Tübingen, Germany

## TABLE OF CONTENTS

### -supplementary methods

- Chemicals
- Autofluorescence and Quenching Measurement

### -supplementary data

- Method optimization with Ph-CCA-NH<sub>2</sub> and DHAP including CV% and S/N analysis shows possibility of both matrices
- Evaluation of best cell number per spot
- Evaluation of matrix suppression effect
- Comparison of automated vs non-automated methods shows increase in signal window due to automation
- Relationship between E3S intensity and concentration
- Comparison of Karlgren publication with MALDI data
- Autofluorescence and quenching of whole data set

## SUPPLEMENTARY METHODS

**CHEMICALS:** Dimethylsulfoxide (DMSO), ethanol, diammonium hydrogen citrate (DAHC), geneticin, poly-L-lysine and estrone-3-sulfate were obtained from Merck (Darmstadt, Germany). Milli-Q water (ddH<sub>2</sub>O; Millipore, Darmstadt, Germany) was prepared in-house. Acetone and acetonitrile (ACN) from VWR (Darmstadt, Germany). Phosphate buffered saline (PBS) was purchased from Biowest (Nuaille, France), trypsin from Corning (Kaiserslautern, Germany), Dulbecco's modified eagle medium (DMEM) from GE Healthcare (Freiburg, Germany) and fetal calf serum (FCS) from Thermo Fisher (Dreieich, Germany). CellTiter-Glo cell viability assay kit was obtained from Promega (Mannheim, Germany), methanol from Fisher Scientific (Schwerte, Germany), 2,5-dihydroxybenzoic acid (DHB) and sDHB (a 9:1 mixture of DHB and 2-hydroxy-5-methoxybenzoic acid) from Bruker Daltonics (Bremen, Germany), 2,5-dihydroxyacetophenone (DHAP) and sodium butyrate from Alfa Aesar (Haverhill, USA). Compounds were obtained from Tocris (Bristol, UK), Selleckchem (Houston, TX), Cayman (Ann Arbor, MI) or provided by GSK compound management (Stevenage, UK). Purity of all commercially sourced inhibitors was  $\geq 99\%$ ; all GSK-internally sourced compounds had  $\geq 95\%$  purity, except raloxifene (94%), tipranavir (91%), cetirizine (90%), diacerein (88%), and P-3004 unergol (87%).

**AUTOFLUORESCENCE AND QUENCHING MEASUREMENT:** For exclusion of possible false negatives and false positives due to autofluorescence and quenching effects during the fluorescence-based assay, the 294 drug set was analyzed and compared with the fluorescence of DBF itself. For testing the autofluorescence, the compounds were dissolved in HBSS to a final concentration of 10  $\mu\text{M}$ . DBF in a concentration of 10  $\mu\text{M}$  served as a comparison. The fluorescence intensities were compared at the excitation wavelength of 485 nm and emission wavelength of 535 nm. For evaluating if there is a quenching effect, DBF was given to each of the compound wells and it was checked if there was a decrease in the fluorescence compared to DBF alone

# SUPPLEMENTARY DATA:

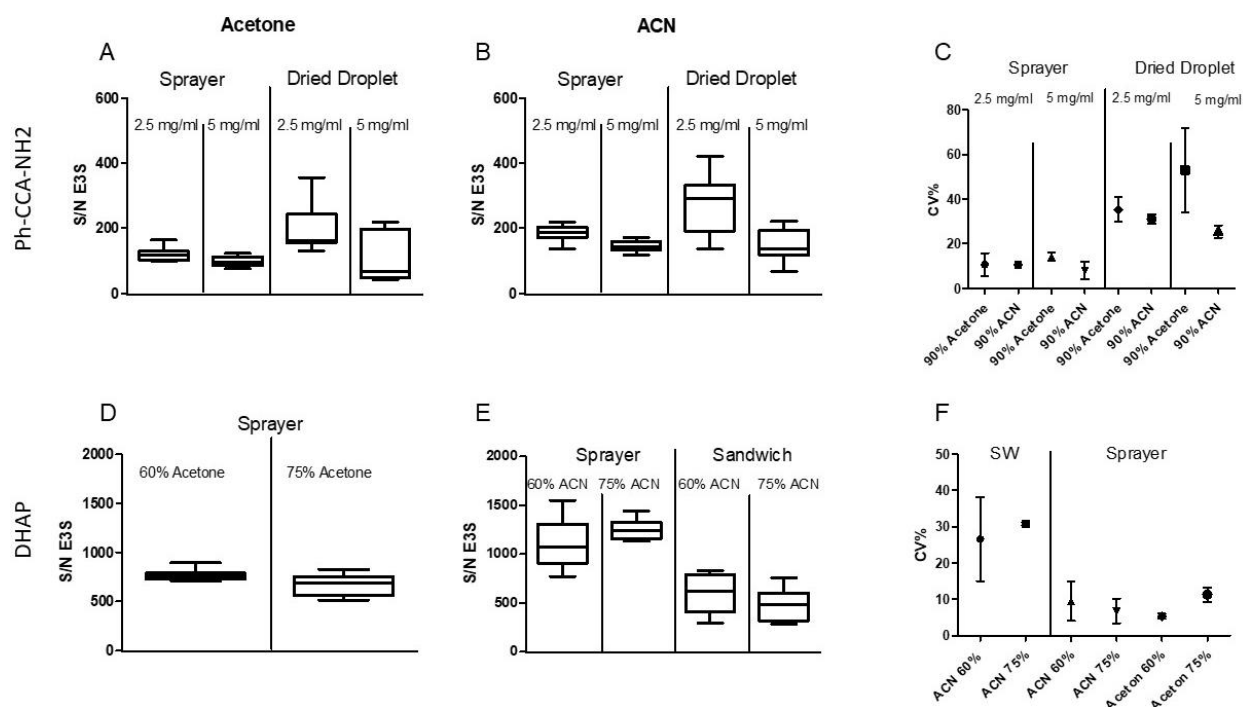

**Figure S1:** Method optimization with Ph-CCA-NH<sub>2</sub> and DHAP including CV% and S/N analysis shows possibility of both matrices: Cell pellets of HEK293 were resuspended at 2500 cells per  $\mu$ L in acetonitrile/ddH<sub>2</sub>O. One microliter of the suspension was applied to a MALDI target plate, which was spray coated with Ph-CCA-NH<sub>2</sub>. For the Dried Droplet application, cell pellets of HEK293 were resuspended at 5000 cells per  $\mu$ L in acetonitrile/ddH<sub>2</sub>O. The cells were mixed 1:1 with matrix before the manual application onto the target plate. E3S was spiked to the cell pellet in the final concentration 1  $\mu$ M. For a control, there were just cells measured without spiked E3S. Samples were measured using a rapifleX MALDI Tissue typer. (A,B,D,E) S/N of the E3S peak is shown in a boxplot of 9 measurement replicates each with median, standard deviation and whiskers of 5-95 percentile. (C,F) CV% of E3S peak of two biological replicates with 9 measurement replicates each. SW, sandwich.

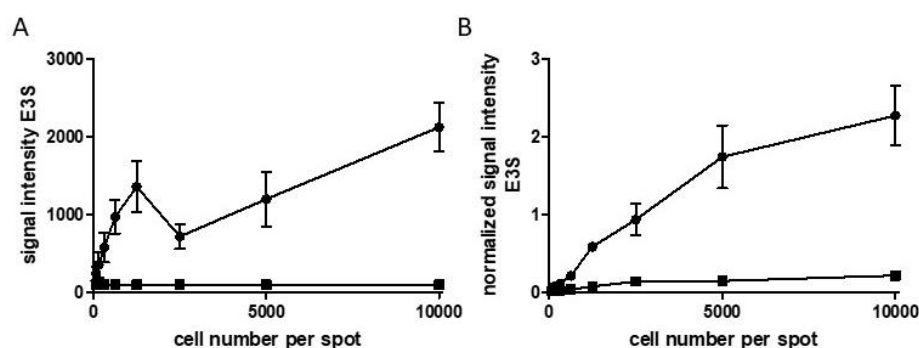

**Figure S2:** Evaluation of best cell number per spot: Comparison of cells treated with E3S (circles) versus vehicle DMSO (squares). Comparison of non-normalized data (A) with data normalized on D<sub>4</sub>-E3S (B). Mean  $\pm$  std. dev. of 9 measurement replicates.

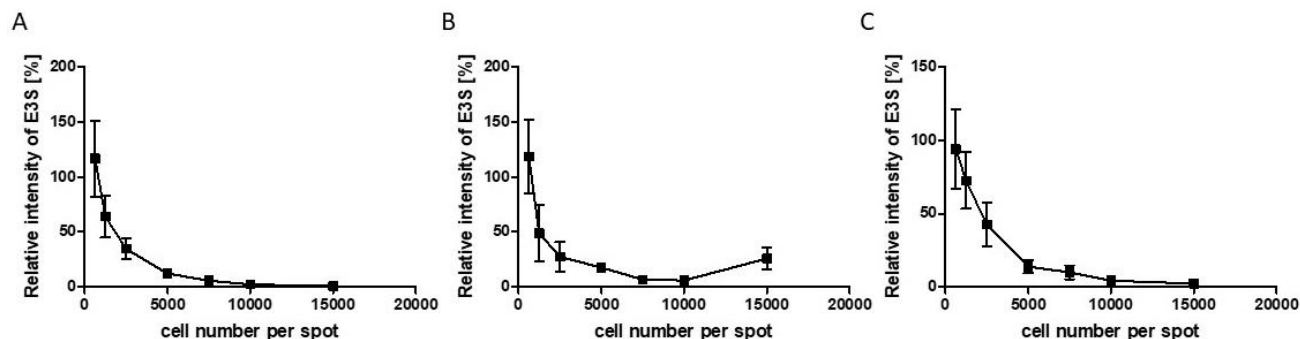

**Figure S3:** Evaluation of matrix suppression effect: Comparison of matrix suppression effect in three different cell passages. Analysis of differing cell numbers per spot. Cells were pelleted and resuspended in different amounts of suspension solution (ddH<sub>2</sub>O/matrix (50/50)). As matrix, 2.5 mg/mL Ph-CCA-NH<sub>2</sub> in 70% ACN was used. Final amount of 0.3  $\mu$ M D4-E3S and 1  $\mu$ M E3S were spiked to the matrix solvent. Cells were spotted manually and measured using a rapifleX MALDI. Shown are 18 measurement replicates with standard deviation. Intensities were normalized through setting 312 cells as 100 %.

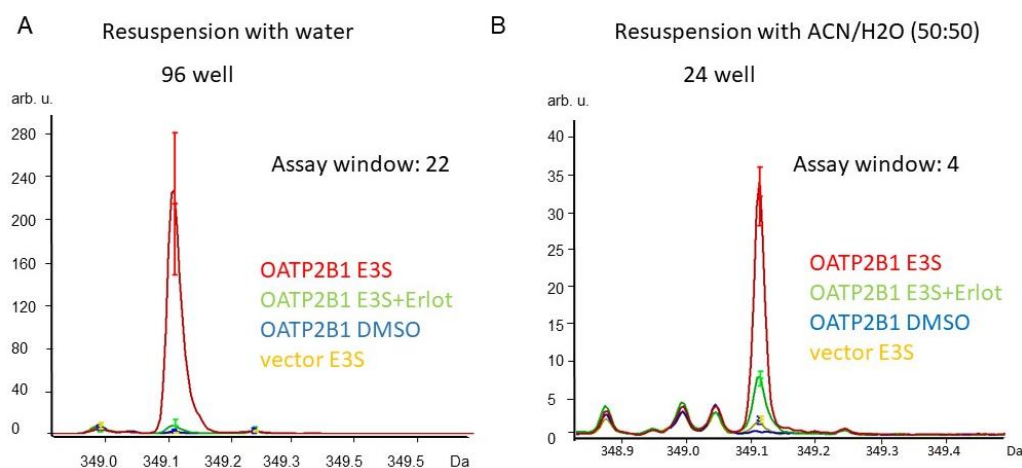

**Figure S4:** Comparison of automated vs non-automated method shows increase in signal window due to automation: HEK293-OATP2B1 cells were treated with 20  $\mu$ M E3S for 30 minutes. In case of 24 well assay, the cell pellet was resuspended at 2500 cells per  $\mu$ l in acetonitrile/ddH<sub>2</sub>O. The cell pellets were resuspended at 5000 cells per  $\mu$ l in acetonitrile/ddH<sub>2</sub>O. Before the manual application onto the plate, the cells were mixed 1:1 with Ph-CCA-NH<sub>2</sub> (2.5 mg/ml in acetonitrile/ddH<sub>2</sub>O (90/10)) and thus applied Dried Droplet. In case of 96 well assay, the cells were resuspended at 10000 cells per  $\mu$ l in ddH<sub>2</sub>O and then mixed 1:1 with Ph-CCA-NH<sub>2</sub> in the above mentioned concentration. Dried Droplet application was done automatically with the CyBio FeliX pipetting platform. Samples were measured using a rapifleX MALDI. (A,B) Plots were done in GraphPadPrism, comparison of cells treated with E3S and DMSO; standard deviation of 9 measurement replicates.

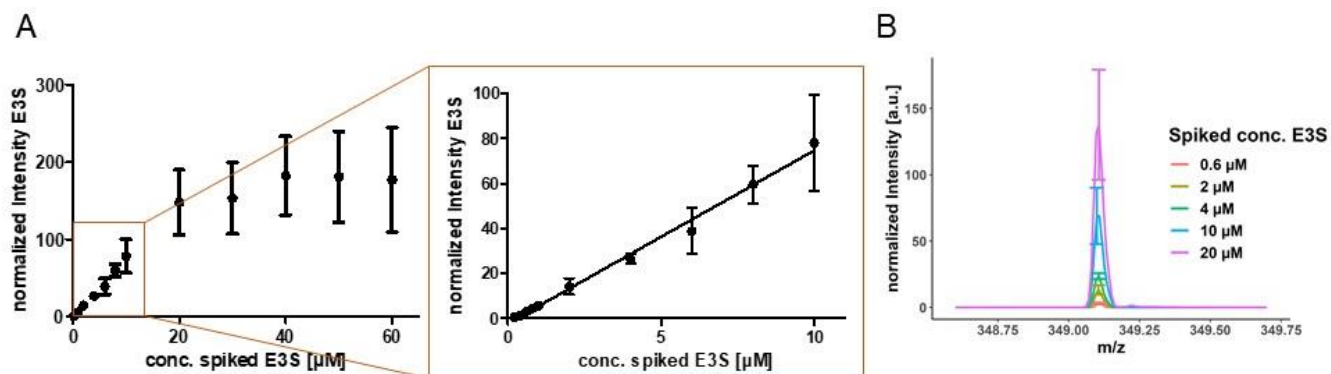

**Figure S5:** Relationship between E3S intensity and concentration: **(A)** HEK293-vec cells were seeded out in a 96 well plate and snap-frozen in liquid nitrogen after harvest. E3S was spiked in different concentrations to the matrix. D4-E3S was spiked to the matrix at the usual concentration of 0.3  $\mu\text{M}$  final. 2.5 mg/mL Ph-CCA- $\text{NH}_2$  in 70 % ACN was used as matrix. D4-E3S-normalized intensities and standard deviation of 4 technical replicates with 4 measurement replicates each are shown. **(B)** Original E3S spectra (not normalized to D4-E3S).

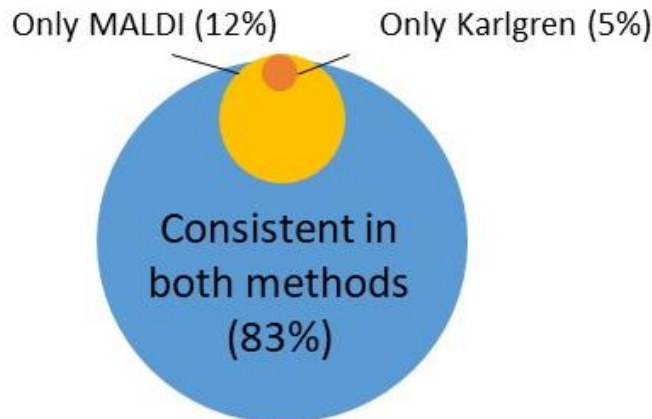

**Figure S6:** Comparison of Karlgren publication (ref. 29) with MALDI data: Overlap of 83% of consistently identified inhibitors/non-inhibitors. Compounds that showed an inhibition of  $50\% \pm 5\%$  in both methods were considered as inhibitor.

**Table S1:** Autofluorescence and Quenching of whole dataset

|                               | Quenching       |             | Autofluorescence |             |
|-------------------------------|-----------------|-------------|------------------|-------------|
|                               | Relative values |             | Relative values  |             |
| Compound                      | 10 $\mu$ M      | 100 $\mu$ M | 10 $\mu$ M       | 100 $\mu$ M |
| Acamprosate                   | 40.6            | 53.7        | 1.4              | 1.8         |
| Acemetacin                    | 85.2            | 80.9        | 1.3              | 1.4         |
| Acetaminophen                 | 107.3           | 108.7       | 1.3              | 1.4         |
| Acyclovir                     | 118.3           | 114.4       | 1.6              | 1.6         |
| Albuterol                     | 105.3           | 103.0       | 1.4              | 1.3         |
| Albuterol Sulfate             | 90.8            | 101.2       | 1.6              | 1.4         |
| Alclofenac                    | 111.9           | 110.6       | 1.4              | 1.6         |
| Alendronate Sodium            | 125.6           | 116.6       | 1.4              | 1.6         |
| Allopurinol                   | 104.8           | 112.9       | 1.3              | 1.5         |
| Alpha Tocopherol              | 110.6           | 105.8       | 1.4              | 1.5         |
| Alpiropide                    | 76.8            | 68.8        | 1.5              | 1.6         |
| Amiodarone Hydrochloride      | 75.9            | 116.4       | 0.9              | 1.0         |
| Amitriptyline                 | 110.3           | 106.3       | 1.4              | 1.6         |
| Amlodipine                    | 70.5            | 69.1        | 1.4              | 1.2         |
| Amlodipine                    | 104.0           | 81.7        | 1.2              | 1.3         |
| Amoxicillin                   | 121.3           | 93.5        | 1.4              | 1.5         |
| Ampiroxicam                   | 107.1           | 107.4       | 1.4              | 1.4         |
| Amsacrine                     | 77.7            | 48.7        | 1.2              | 1.1         |
| Anastrozole                   | 112.7           | 111.8       | 1.4              | 1.7         |
| Aripiprazole                  | 113.6           | 112.3       | 1.0              | 1.0         |
| Aspirin                       | 111.2           | 110.1       | 1.4              | 1.6         |
| Astemizole + Pseudoephedrine  | 86.7            | 94.1        | 1.5              | 1.5         |
| Atenolol                      | 112.7           | 109.6       | 1.4              | 1.6         |
| Atomoxetine Hydrochloride     | 110.6           | 107.7       | 1.3              | 1.5         |
| Atorvastatin                  | 99.2            | 78.2        | 0.9              | 1.0         |
| Azathioprine                  | 114.0           | 111.2       | 1.4              | 1.6         |
| Azithromycin                  | 113.6           | 110.5       | 1.3              | 1.1         |
| Azulene sodium sulfonate      | 107.6           | 100.3       | 0.8              | 1.1         |
| Baclofen                      | 116.9           | 114.1       | 1.4              | 1.6         |
| Beclomethasone                | 86.3            | 81.4        | 1.3              | 1.0         |
| Benazepril Hydrochloride      | 121.8           | 120.2       | 1.4              | 1.5         |
| Benzbromarone                 | 116.2           | 108.5       | 1.3              | 1.0         |
| Benzonatate                   | 118.2           | 107.4       | 1.3              | 1.4         |
| Benzoyl peroxide              | 128.7           | 119.3       | 1.4              | 1.6         |
| Bicalutamide                  | 113.3           | 91.2        | 1.3              | 0.9         |
| Bisoprolol Fumarate           | 109.7           | 108.8       | 1.4              | 1.6         |
| Brimonidine Tartrate          | 110.5           | 105.5       | 1.4              | 1.7         |
| Budesonide                    | 108.7           | 95.2        | 1.4              | 1.4         |
| Bumetanide                    | 109.3           | 108.9       | 1.3              | 1.5         |
| Bupropion                     | 116.7           | 80.0        | 1.4              | 1.7         |
| Buspirone Hydrochloride       | 91.4            | 88.5        | 1.4              | 1.5         |
| Calcitriol                    | 107.8           | 93.3        | 0.8              | 1.0         |
| Carbamazepine                 | 93.9            | 99.6        | 1.4              | 1.6         |
| Carbidopa                     | 118.0           | 112.1       | 1.6              | 1.7         |
| Carvedilol                    | 90.5            | 84.5        | 1.0              | 1.0         |
| Cefdinir                      | 85.7            | 93.1        | 1.3              | 1.3         |
| Celecoxib                     | 112.2           | 97.2        | 1.3              | 1.0         |
| Cephalexin                    | 106.9           | 115.2       | 1.3              | 1.2         |
| Ceritinib                     | 89.4            | 43.1        | 0.9              | 1.1         |
| Cetirizine Hydrochloride      | 118.3           | 111.4       | 1.4              | 1.1         |
| Chlorhexidine                 | 107.9           | 59.2        | 1.3              | 1.2         |
| Chlorthalidone                | 106.7           | 107.8       | 1.4              | 1.5         |
| Cholecalciferol               | 114.9           | 115.5       | 1.0              | 1.1         |
| Cicloxic acid                 | 109.3           | 116.5       | 1.4              | 1.6         |
| Ciprofloxacin                 | 117.1           | 109.1       | 1.5              | 1.6         |
| Citalopram                    | 111.9           | 108.4       | 1.4              | 1.5         |
| Clavulanate Potassium         | 121.5           | 116.4       | 1.3              | 1.6         |
| Clindamycin hydrochloride     | 110.8           | 107.4       | 1.3              | 1.4         |
| Clobetasol Propionate         | 109.0           | 100.7       | 1.0              | 1.0         |
| Clonidine                     | 83.3            | 80.6        | 1.5              | 1.8         |
| Clopidogrel Bisulfate         | 93.8            | 91.7        | 1.4              | 1.4         |
| Colchicine                    | 109.2           | 99.6        | 1.3              | 1.4         |
| Colforsin daropate            | 52.1            | 60.3        | 1.5              | 1.5         |
| Conjugated Estrogens          | 118.8           | 116.3       | 1.4              | 1.7         |
| Cromoglicic acid              | 111.6           | 116.1       | 1.4              | 1.5         |
| Cyclobenzaprine Hydrochloride | 100.3           | 110.2       | 1.4              | 1.6         |
| Cyclosporine                  | 84.8            | 80.9        | 0.8              | 0.8         |
| Cysteamine                    | 81.6            | 86.6        | 1.5              | 1.7         |
| Desogestrel                   | 65.8            | 92.6        | 1.3              | 1.4         |
| Desonide                      | 107.5           | 108.6       | 1.3              | 1.4         |
| Desvenlafaxine                | 108.4           | 115.1       | 1.4              | 1.4         |
| Diacerein                     | 108.7           | 107.8       | 1.3              | 1.4         |
| Diclofenac                    | 106.8           | 111.1       | 1.3              | 1.5         |
| Dicyclomine Hydrochloride     | 106.7           | 102.3       | 1.4              | 1.6         |
| Diethylstilbestrol            | 92.8            | 89.4        | 1.4              | 1.7         |
| Diflunisal                    | 112.8           | 108.5       | 1.3              | 1.6         |
| Diltiazem Hydrochloride       | 43.8            | 57.2        | 1.5              | 1.6         |
| Diphenhydramine Hydrochloride | 110.5           | 106.8       | 1.4              | 1.5         |
| Dipyridamole                  | 103.8           | 92.6        | 0.8              | 1.2         |
| Dithranol                     | 111.7           | 105.3       | 1.2              | 0.9         |
| Divalproex Sodium             | 111.7           | 105.8       | 1.3              | 1.6         |
| Donepezil Hydrochloride       | 50.3            | 58.1        | 1.5              | 1.6         |
| Dorzolamide Hydrochloride     | 104.9           | 96.5        | 1.4              | 1.5         |
| Doxazosin Mesylate            | 94.3            | 68.2        | 1.0              | 1.0         |
| Doxepin Hydrochloride         | 83.7            | 82.9        | 1.5              | 1.6         |
| Doxycycline                   | 74.3            | 63.6        | 0.9              | 1.3         |
| Doxycycline                   | 127.0           | 76.1        | 1.0              | 1.2         |
| Dronedarone                   | 109.8           | 77.3        | 1.0              | 1.0         |
| Drospirenone                  | 107.8           | 95.2        | 1.2              | 0.9         |
| Duloxetine                    | 85.4            | 88.3        | 1.4              | 1.6         |
| Efalith                       | 110.1           | 116.3       | 1.4              | 1.6         |
| Efamol                        | 111.4           | 107.2       | 1.3              | 0.9         |
| Efavirenz                     | 90.5            | 78.3        | 1.3              | 1.3         |
| Enalapril Maleate             | 109.3           | 109.6       | 1.3              | 1.5         |
| Enprostil                     | 63.9            | 91.2        | 1.6              | 1.8         |
| Ergocalciferol                | 79.5            | 90.5        | 1.2              | 1.4         |
| Erlotinib                     | 109.1           | 75.8        | 1.4              | 0.9         |
| Erythromycin                  | 110.6           | 101.2       | 1.4              | 1.2         |
| Escitalopram Oxalate          | 92.6            | 96.2        | 1.4              | 1.5         |
| Estradiol                     | 111.4           | 108.2       | 1.3              | 1.5         |
| Ethanolamine oleate           | 106.0           | 119.4       | 1.4              | 1.7         |
| Ethinyl Estradiol             | 84.8            | 91.7        | 1.5              | 1.6         |
| Etodolac                      | 105.5           | 104.0       | 1.4              | 1.6         |
| Etretinate                    | 108.2           | 110.4       | 1.3              | 1.4         |
| Ezetimibe                     | 106.1           | 90.8        | 0.8              | 0.8         |
| Famotidine                    | 121.6           | 113.9       | 1.5              | 1.5         |
| Felbinac                      | 109.2           | 111.1       | 1.4              | 1.5         |
| Felodipine                    | 91.4            | 84.0        | 1.1              | 1.0         |
| Fenbufen                      | 64.3            | 98.5        | 1.4              | 1.6         |
| Fenofibrate                   | 111.8           | 108.2       | 1.3              | 1.4         |
| Finasteride                   | 105.0           | 104.3       | 1.3              | 1.0         |
| Fluconazole                   | 113.0           | 111.7       | 1.3              | 1.5         |
| Fluocinonide                  | 114.4           | 101.6       | 1.3              | 1.1         |
| Fluoxetine Hydrochloride      | 66.7            | 90.7        | 1.5              | 1.8         |
| Flurbiprofen                  | 110.5           | 106.3       | 1.4              | 1.6         |
| Flutamide                     | 95.6            | 92.2        | 1.3              | 1.5         |
| Fluticasone                   | 108.8           | 101.0       | 1.4              | 1.3         |
| Fluticasone Propionate        | 110.2           | 89.9        | 1.1              | 1.3         |
| Fluvastatin                   | 116.3           | 94.2        | 1.0              | 1.3         |
| Folic Acid                    | 45.0            | 58.9        | 1.5              | 1.7         |
| Foscarnet                     | 122.4           | 120.9       | 1.5              | 1.7         |
| Fosfosal                      | 101.7           | 103.5       | 1.4              | 1.6         |
| Furosemide                    | 112.4           | 113.4       | 1.3              | 1.5         |
| Gabapentin                    | 101.1           | 90.6        | 1.3              | 1.6         |
| Gemfibrozil                   | 113.1           | 113.7       | 1.3              | 1.5         |
| Genistein                     | 116.2           | 106.7       | 1.5              | 1.5         |
| Glimepiride                   | 116.4           | 108.6       | 1.4              | 1.3         |
| Glipizide                     | 78.5            | 76.9        | 1.5              | 1.7         |
| Gliquinone                    | 105.4           | 86.4        | 0.9              | 0.9         |
| Glyburide                     | 111.9           | 101.3       | 1.3              | 0.8         |
| Guacetasal                    | 117.3           | 109.0       | 1.4              | 1.6         |
| Guaifenesin                   | 111.7           | 111.7       | 1.3              | 1.6         |
| Guanfacine                    | 117.4           | 110.9       | 1.4              | 1.6         |
| Haloperidol                   | 117.0           | 107.4       | 1.4              | 1.4         |
| Hydralazine Hydrochloride     | 104.6           | 106.8       | 1.3              | 1.5         |
| Hydrochlorothiazide           | 115.7           | 112.6       | 1.4              | 1.6         |
| Hydrocortisone                | 111.2           | 110.9       | 1.6              | 1.8         |
| Hydroxychloroquine Sulfate    | 112.5           | 100.6       | 1.4              | 1.5         |
| Hydroxyzine                   | 90.6            | 86.2        | 1.4              | 1.3         |
| Ibuprofen                     | 112.2           | 114.3       | 1.4              | 1.6         |
| Indapamide                    | 110.8           | 109.2       | 1.4              | 1.2         |
| Indomethacin                  | 117.0           | 110.9       | 1.3              | 1.5         |
| Iornoxicam                    | 94.2            | 88.7        | 1.4              | 1.6         |
| Ioxoprofen                    | 116.1           | 117.7       | 1.4              | 1.6         |
| Ipriflavone                   | 114.9           | 110.1       | 1.3              | 1.3         |
| Irbesartan                    | 119.7           | 111.1       | 1.4              | 1.3         |
| Isoorbide Mononitrate         | 106.8           | 107.5       | 1.3              | 1.6         |
| itraconazole                  | 92.9            | 81.5        | 1.1              | 1.6         |
| Ketoconazole                  | 110.7           | 112.9       | 0.9              | 1.5         |
| Ketoprofen                    | 92.2            | 98.5        | 1.4              | 1.5         |

| Compound                          | Quenching       |             | Autofluorescence |             |
|-----------------------------------|-----------------|-------------|------------------|-------------|
|                                   | Relative values |             | Relative values  |             |
|                                   | 10 $\mu$ M      | 100 $\mu$ M | 10 $\mu$ M       | 100 $\mu$ M |
| Ketorolac Tromethamine            | 87.9            | 84.7        | 1.5              | 1.5         |
| Labetalol                         | 108.7           | 111.4       | 1.2              | 1.2         |
| Lamotrigine                       | 129.4           | 109.7       | 1.4              | 1.6         |
| Lansoprazole                      | 113.0           | 93.7        | 1.2              | 1.3         |
| Latanoprost                       | 91.9            | 87.8        | 1.4              | 1.6         |
| Letrozole                         | 87.8            | 89.8        | 1.5              | 1.6         |
| Levetiracetam                     | 86.4            | 92.6        | 1.4              | 1.7         |
| Levocetirizine Dihydrochloride    | 115.3           | 114.5       | 0.9              | 1.4         |
| Levodopa                          | 108.2           | 115.5       | 1.4              | 1.6         |
| Levofloxacin                      | 91.2            | 91.8        | 1.5              | 1.6         |
| Levosulpiride                     | 113.4           | 106.1       | 1.4              | 1.4         |
| Levothyroxine                     | 110.2           | 78.6        | 1.2              | 1.3         |
| Lidocaine                         | 106.9           | 102.8       | 1.4              | 1.5         |
| Lisinopril                        | 91.1            | 94.4        | 1.5              | 1.6         |
| Lithium                           | 97.5            | 93.6        | 1.5              | 1.7         |
| Loratadine                        | 116.1           | 99.2        | 1.2              | 1.0         |
| Losartan Potassium                | 104.7           | 106.8       | 1.3              | 0.9         |
| Lovastatin                        | 92.3            | 78.6        | 1.2              | 0.9         |
| Meclizine Hydrochloride           | 105.8           | 114.7       | 1.3              | 1.1         |
| Medroxyprogesterone Acetate       | 61.1            | 81.3        | 1.2              | 1.0         |
| meglitrol                         | 108.7           | 111.3       | 1.3              | 1.6         |
| Meloxicam                         | 97.7            | 93.9        | 1.5              | 1.6         |
| Mesalamine                        | 113.8           | 109.0       | 1.3              | 1.4         |
| Mesna                             | 111.9           | 118.4       | 1.4              | 1.6         |
| Meso-2,3,-Dimercaptosuccinic acid | 107.9           | 112.3       | 1.2              | 1.1         |
| Metaxalone                        | 106.8           | 112.5       | 1.4              | 1.6         |
| Metformin Hydrochloride           | 119.2           | 110.3       | 1.5              | 1.6         |
| Methimazole                       | 107.8           | 104.9       | 1.4              | 1.6         |
| Methocarbamol                     | 85.3            | 90.1        | 1.4              | 1.7         |
| Methotrexate                      | 88.5            | 90.4        | 1.5              | 1.5         |
| Methylprednisolone                | 102.8           | 95.7        | 1.4              | 1.3         |
| Metoclopramide Hydrochloride      | 113.3           | 113.3       | 1.5              | 1.7         |
| Metoprolol                        | 106.2           | 113.3       | 1.4              | 1.6         |
| Metronidazole                     | 117.0           | 119.5       | 1.4              | 1.6         |
| Minocycline Hydrochloride         | 97.4            | 72.3        | 0.9              | 1.4         |
| Mirtazapine                       | 104.5           | 111.4       | 1.3              | 1.4         |
| Mofezolac                         | 118.0           | 113.8       | 1.5              | 1.6         |
| Mometasone Furoate                | 98.6            | 105.2       | 0.8              | 1.5         |
| Mometasone Furoate                | 68.9            | 64.2        | 1.1              | 1.4         |
| Montelukast                       | 110.1           | 97.0        | 0.9              | 1.1         |
| Moxifloxacin Hydrochloride        | 113.7           | 96.9        | 1.4              | 1.4         |
| Mycophenolate Mofetil             | 100.0           | 91.0        | 1.5              | 1.6         |
| Mycophenolic acid                 | 117.7           | 115.5       | 1.4              | 1.6         |
| Nabumetone                        | 97.7            | 93.6        | 1.4              | 1.5         |
| Nadolol                           | 114.0           | 106.4       | 1.6              | 1.7         |
| Naphazoline Hydrochloride         | 111.9           | 106.7       | 1.4              | 1.5         |
| Naproxen                          | 93.9            | 88.7        | 1.4              | 1.6         |
| Nebivolol Hydrochloride           | 103.8           | 89.0        | 1.2              | 1.2         |
| Neomycin                          | 112.2           | 107.8       | 1.3              | 1.5         |
| Niacin                            | 112.1           | 112.1       | 1.4              | 1.5         |
| Nifedipine                        | 93.1            | 97.1        | 1.3              | 1.2         |
| Nitrofurantoin                    | 95.1            | 93.4        | 1.3              | 1.5         |
| Norethindrone                     | 115.4           | 119.6       | 1.4              | 1.1         |
| Nortriptyline Hydrochloride       | 101.2           | 99.6        | 1.4              | 1.5         |
| Novobiocin                        | 103.8           | 82.7        | 0.9              | 1.1         |
| Ofloxacin                         | 96.5            | 97.4        | 1.4              | 1.3         |
| Olanzapine                        | 111.5           | 105.1       | 1.3              | 1.0         |
| Olmesartan Medoxomil              | 114.6           | 105.2       | 1.3              | 1.0         |
| Olopatadine Hydrochloride         | 88.8            | 88.7        | 1.4              | 1.4         |
| Olsalazine                        | 84.8            | 85.2        | 1.4              | 1.5         |
| Omega-3 acid ethyl ester Omtryg   | 121.6           | 104.2       | 1.4              | 1.3         |
| Omeprazole                        | 115.4           | 107.2       | 1.4              | 1.3         |
| Oseltamivir Phosphate             | 117.0           | 107.3       | 1.4              | 1.6         |
| Oxaprozin                         | 116.8           | 118.3       | 1.4              | 1.1         |
| Oxcarbazepine                     | 109.9           | 104.1       | 1.3              | 1.3         |
| Oxybutynin                        | 87.2            | 97.0        | 1.4              | 1.2         |
| P-3004Unergol                     | 100.3           | 82.9        | 0.9              | 1.0         |
| Pantoprazole Sodium               | 93.5            | 103.7       | 1.4              | 1.3         |
| Parecoxib                         | 113.5           | 117.0       | 1.3              | 1.3         |
| Paroxetine                        | 134.0           | 107.0       | 1.4              | 1.6         |
| Pemetrexed                        | 111.5           | 116.5       | 1.4              | 1.5         |
| Penicillin V                      | 69.6            | 72.4        | 1.5              | 1.7         |
| Pheniramine Maleate               | 112.4           | 102.4       | 1.4              | 1.6         |
| Phenytoin                         | 112.6           | 109.7       | 1.4              | 1.6         |
| Pioglitazone Hydrochloride        | 117.6           | 123.8       | 1.3              | 1.2         |
| pipotiazine                       | 107.0           | 112.3       | 1.0              | 1.4         |
| Piretanide                        | 109.4           | 108.8       | 1.4              | 1.4         |
| Piroxicam                         | 109.8           | 110.2       | 1.2              | 1.5         |
| Piroxicam                         | 97.6            | 91.0        | 1.3              | 1.6         |
| Potassium Citrate                 | 107.6           | 114.3       | 1.4              | 1.6         |
| Pramipexole Dihydrochloride       | 104.3           | 107.0       | 1.3              | 1.4         |
| Pranoprofen                       | 110.9           | 105.2       | 1.4              | 1.6         |
| Prasugrel Hydrochloride           | 95.9            | 83.6        | 1.3              | 1.6         |
| Pravastatin Sodium                | 69.7            | 88.0        | 1.3              | 1.4         |
| Prednisolone                      | 107.2           | 97.9        | 1.3              | 1.4         |
| Prednisone                        | 102.8           | 98.1        | 1.4              | 1.2         |
| Probenecid                        | 120.7           | 116.4       | 1.3              | 1.6         |
| Progesterone                      | 117.5           | 114.1       | 1.5              | 1.5         |
| Promethazine Hydrochloride        | 112.0           | 110.9       | 1.4              | 1.5         |
| Propafenone                       | 116.2           | 111.7       | 1.4              | 1.5         |
| Propagermanium                    | 119.6           | 115.5       | 1.6              | 1.7         |
| Propranolol Hydrochloride         | 107.3           | 102.6       | 1.4              | 1.5         |
| Quetiapine Fumarate               | 114.4           | 101.0       | 1.3              | 0.9         |
| Quinapril                         | 117.3           | 106.8       | 1.3              | 1.5         |
| Raloxifene Hydrochloride          | 110.5           | 86.8        | 1.2              | 1.2         |
| Ramipril                          | 83.8            | 105.7       | 1.3              | 1.5         |
| Ranitidine                        | 91.8            | 96.5        | 1.3              | 1.6         |
| Reserpine                         | 96.2            | 84.7        | 0.8              | 1.1         |
| Risperidone                       | 110.5           | 113.2       | 1.4              | 1.3         |
| Rivaroxaban                       | 112.9           | 104.3       | 1.1              | 1.2         |
| Ropinirole Hydrochloride          | 119.6           | 104.9       | 1.3              | 1.6         |
| Sertraline Hydrochloride          | 98.7            | 88.0        | 1.4              | 1.2         |
| Sildenafil                        | 95.9            | 89.4        | 1.3              | 1.1         |
| Silymarin                         | 98.5            | 97.0        | 1.2              | 1.1         |
| Simvastatin                       | 96.1            | 93.8        | 0.7              | 1.0         |
| Sitagliptin Phosphate             | 109.1           | 108.2       | 1.3              | 1.1         |
| Sivelestat                        | 79.2            | 82.1        | 1.5              | 1.6         |
| Sodium phenylbutyrate             | 109.2           | 107.0       | 1.4              | 1.6         |
| Sodium salicate                   | 117.7           | 115.9       | 1.6              | 1.7         |
| Spironolactone                    | 105.1           | 104.0       | 1.2              | 1.0         |
| Sulfamethoxazole                  | 110.2           | 109.3       | 1.4              | 1.6         |
| Sulfasalazine                     | 112.3           | 104.7       | 1.3              | 1.6         |
| Sulindac                          | 109.0           | 100.0       | 1.3              | 1.5         |
| Sulpiride                         | 109.6           | 98.1        | 1.4              | 1.5         |
| Sulprostone                       | 105.0           | 116.3       | 1.3              | 1.5         |
| Sumatriptan                       | 109.7           | 102.6       | 1.4              | 1.5         |
| Tacrolimus                        | 71.7            | 73.0        | 1.0              | 1.1         |
| Tamoxifen Citrate                 | 101.6           | 106.9       | 1.2              | 0.8         |
| Tamsulosin Hydrochloride          | 92.0            | 87.9        | 1.3              | 1.3         |
| Terazosin                         | 106.0           | 83.7        | 1.2              | 1.1         |
| Tetracycline                      | 109.2           | 106.6       | 1.2              | 1.0         |
| Tianeptine                        | 114.7           | 111.2       | 1.2              | 1.1         |
| Tiaprofen                         | 101.2           | 107.0       | 1.4              | 1.6         |
| Ticagrelor                        | 106.7           | 108.1       | 1.7              | 1.5         |
| Timolol                           | 89.0            | 98.9        | 1.4              | 1.7         |
| Tipranavir                        | 94.1            | 97.7        | 0.9              | 1.0         |
| Tizanidine                        | 108.8           | 109.8       | 1.4              | 1.6         |
| Tolterodine Tartrate              | 117.0           | 105.2       | 1.5              | 1.6         |
| Topiramate                        | 111.6           | 112.6       | 1.4              | 1.7         |
| Torsemide                         | 108.0           | 114.5       | 1.4              | 1.6         |
| Travoprost                        | 98.5            | 105.1       | 1.3              | 1.6         |
| Trazodone Hydrochloride           | 86.6            | 101.5       | 1.3              | 1.3         |
| Trepibutone                       | 91.2            | 92.2        | 1.5              | 1.7         |
| Triamcinolone                     | 108.8           | 110.6       | 1.4              | 1.6         |
| Triamterene                       | 87.6            | 93.3        | 1.4              | 1.4         |
| Triflusal                         | 112.1           | 112.4       | 1.3              | 1.5         |
| Trimethoprim                      | 110.6           | 102.5       | 1.4              | 1.5         |
| Tropine indometacinat             | 97.1            | 83.3        | 1.0              | 0.9         |
| Valacyclovir                      | 101.8           | 94.4        | 1.4              | 1.6         |
| Valsartan                         | 113.3           | 114.8       | 1.3              | 1.5         |
| Venlafaxine Hydrochloride         | 103.1           | 95.3        | 1.4              | 1.6         |
| Verapamil                         | 111.5           | 110.3       | 1.3              | 1.0         |
| Verapamil Hydrochloride           | 114.7           | 103.5       | 1.3              | 1.2         |
| Vilazodone Hydrochloride          | 99.3            | 104.2       | 0.7              | 1.5         |
| Warfarin                          | 111.2           | 112.5       | 1.4              | 1.5         |
| Xipamide                          | 100.1           | 92.0        | 1.4              | 1.5         |
| Zafirlukast                       | 102.3           | 84.6        | 0.7              | 1.1         |
